# Supplementary material for: Constructing a tunable defect structure in TiO2 for photocatalytic nitrogen fixation
Source: Royal Society of Chemistry journal article supplement (doi:10.1039/c9ta10471b), 2019-11-25
Supplement: c9ta10471b1.pdf [file c9ta10471b1.pdf]

Supporting Information

## **Constructing a tunable defect structure in TiO<sub>2</sub> for photocatalytic nitrogen fixation**

Guoqiang Zhang,<sup>a</sup> Xun Yang,<sup>c</sup> Chuanxin He,<sup>a,b</sup> Peixin Zhang,<sup>a,b</sup> Hongwei Mi<sup>\*,a,b</sup>

<sup>a</sup> College of Chemistry and Environmental Engineering, Shenzhen University,  
Shenzhen, Guangdong, 518060, PR China. E-mail: milia807@szu.edu.cn

<sup>b</sup> Guangdong Flexible Wearable Energy and Tools Engineering Technology Research  
Centre Shenzhen University, Shenzhen, Guangdong, 518060, PR China.

<sup>c</sup> School of Physics, Zhengzhou University, Zhengzhou 450052, China.

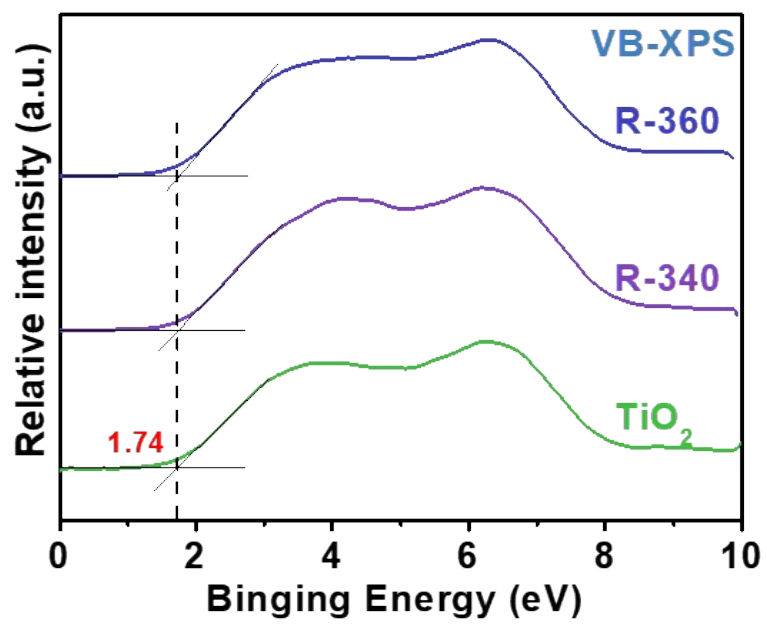

Figure S1. VB-XPS of anatase, R-340 and R-360.

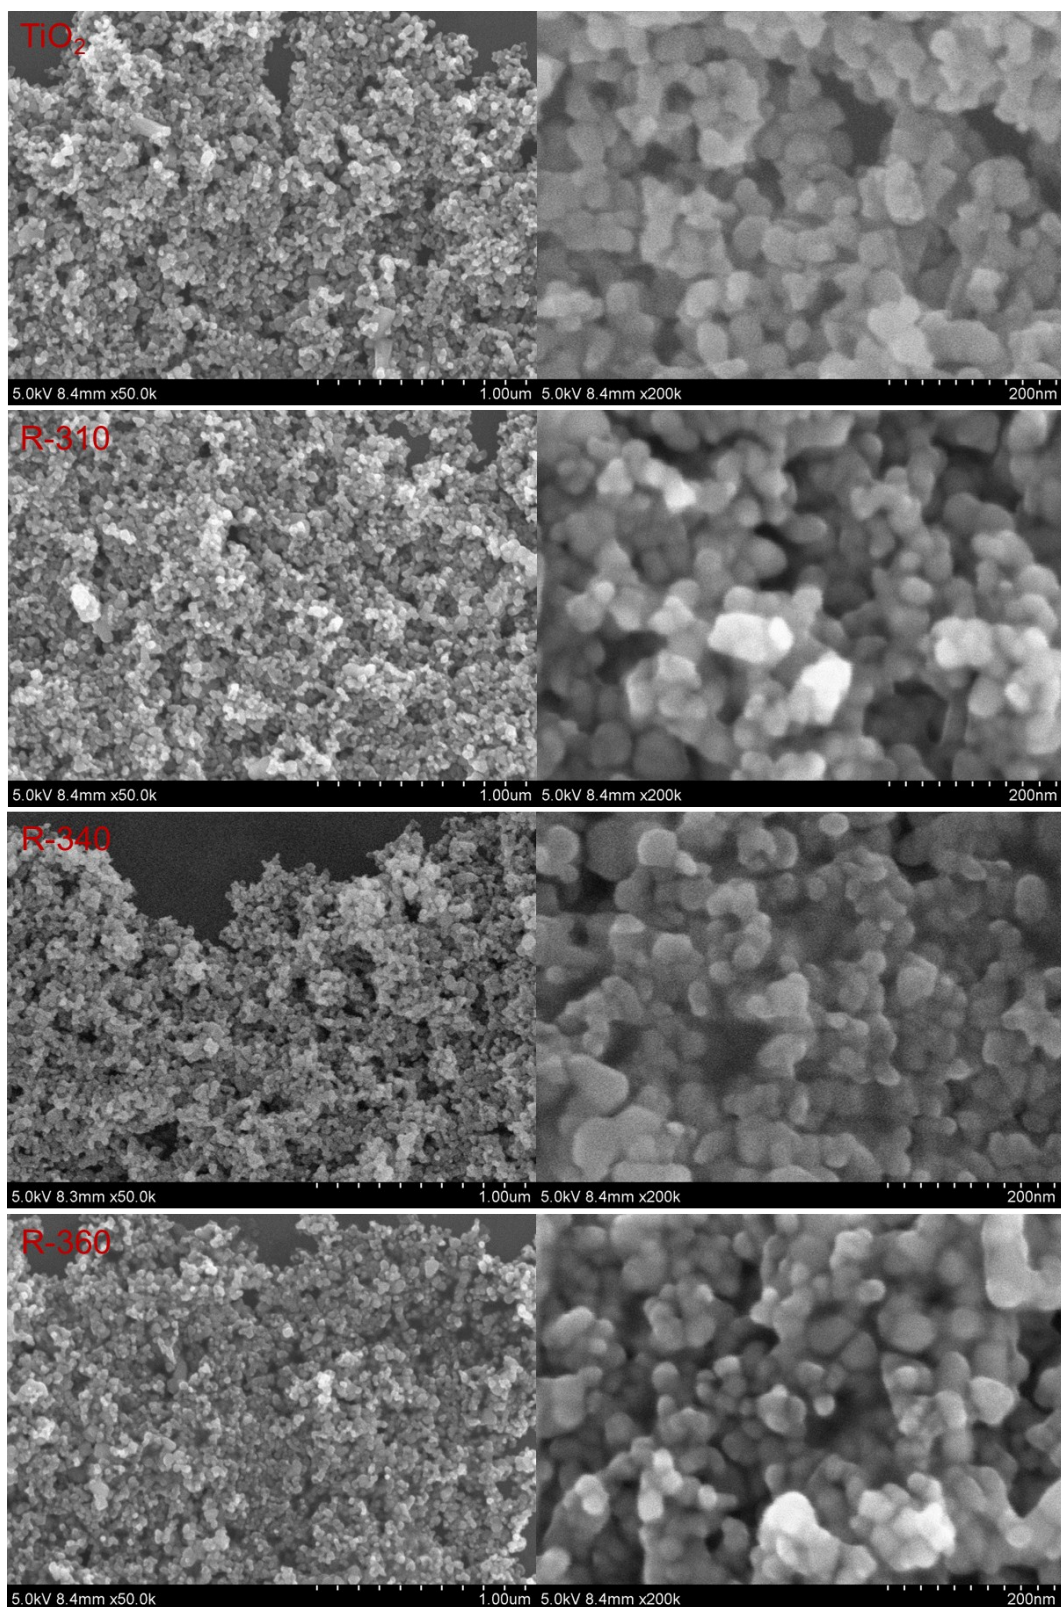

**Figure S2.** The SEM images of anatase and reduced  $\text{TiO}_2$  (R-310, R-340, R-360).

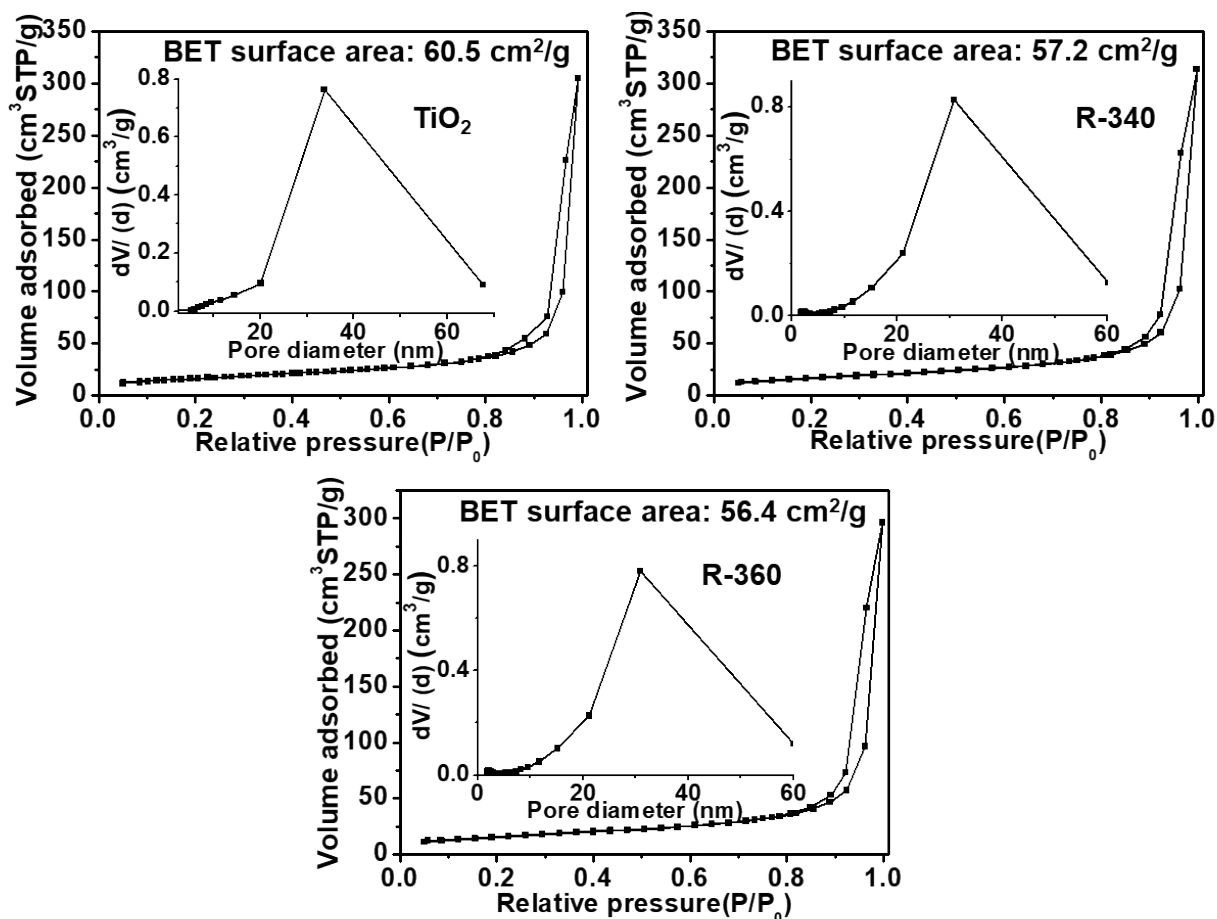

**Figure S3.** The N<sub>2</sub> adsorption-desorption isotherms of anatase and reduced TiO<sub>2</sub> (R-340, R-360), insets are pore size distributions.

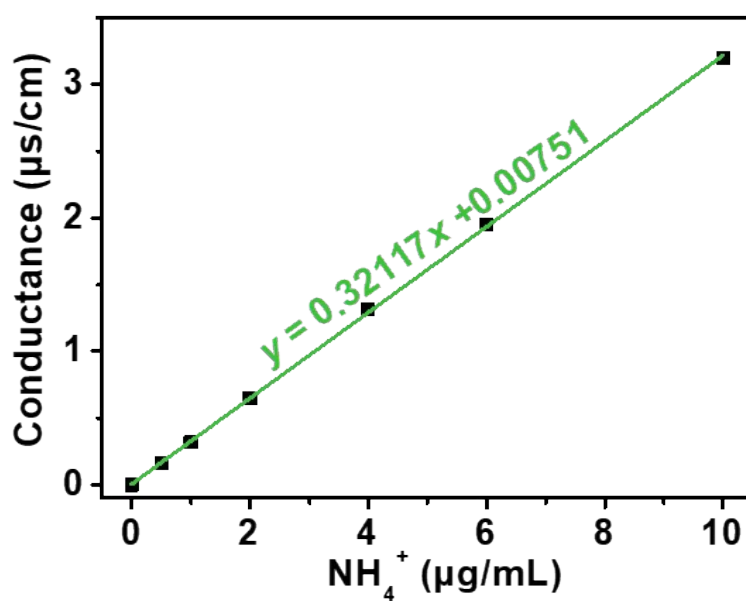

**Figure S4.** The standard curve of NH<sub>4</sub><sup>+</sup> amount detected by cation exchange

chromatography.

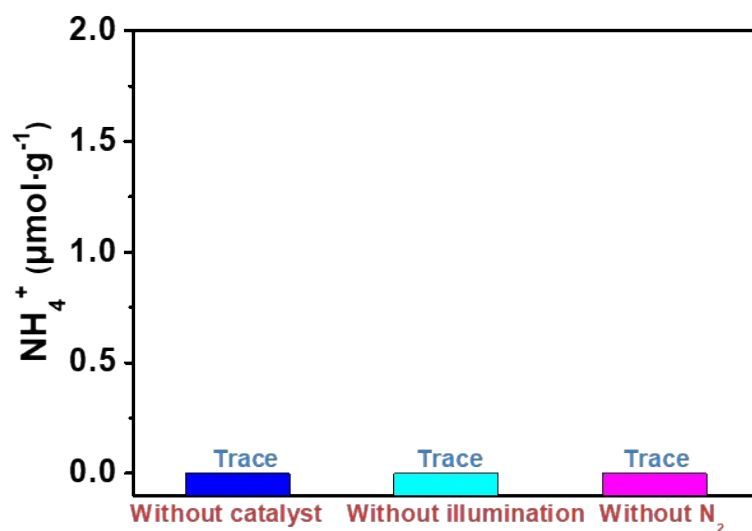

**Figure S5.** Control experiments for  $\text{N}_2$  fixation reaction conducted in the absence of any one of the following: light irradiation,  $\text{N}_2$  or the catalyst.

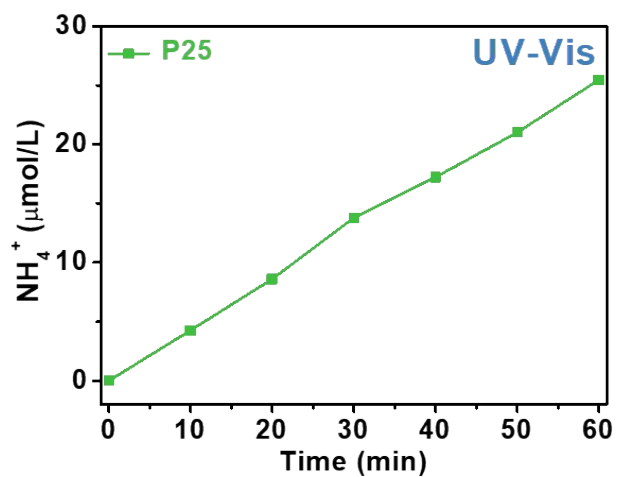

**Figure S6.** The full spectrum  $\text{N}_2$  fixation of P25. The 50 mg of P25 samples were dispersed into 100 mL of 10 vol% methanol solution under full spectrum irradiations for  $\text{N}_2$  fixation.

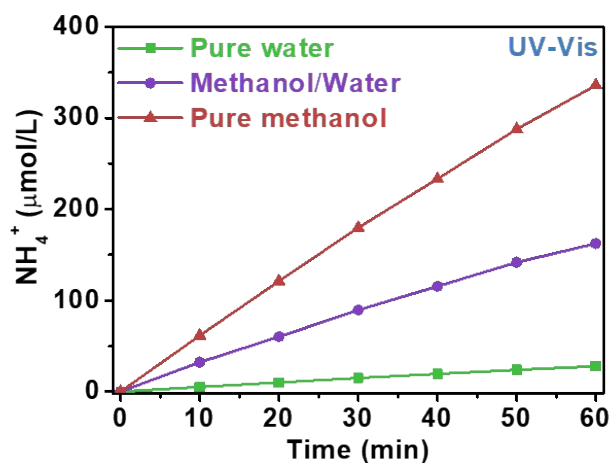

**Figure S7.** The full spectrum nitrogen fixation of R-340 in pure water, methanol/water and methanol.

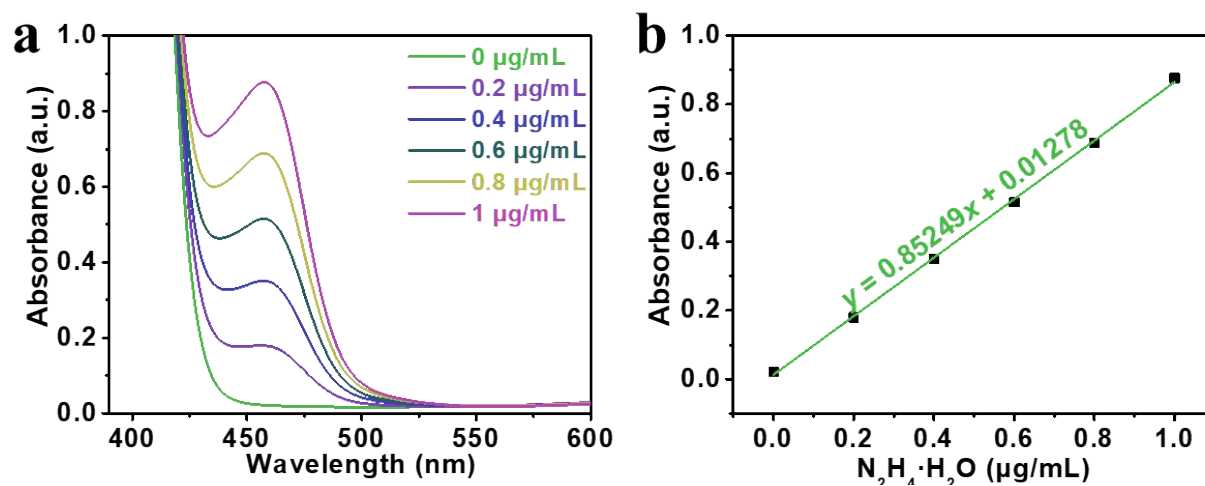

**Figure S8.** The detection of hydrazine, UV-Vis spectra curves (a) and the standard curve of hydrazine content (b).

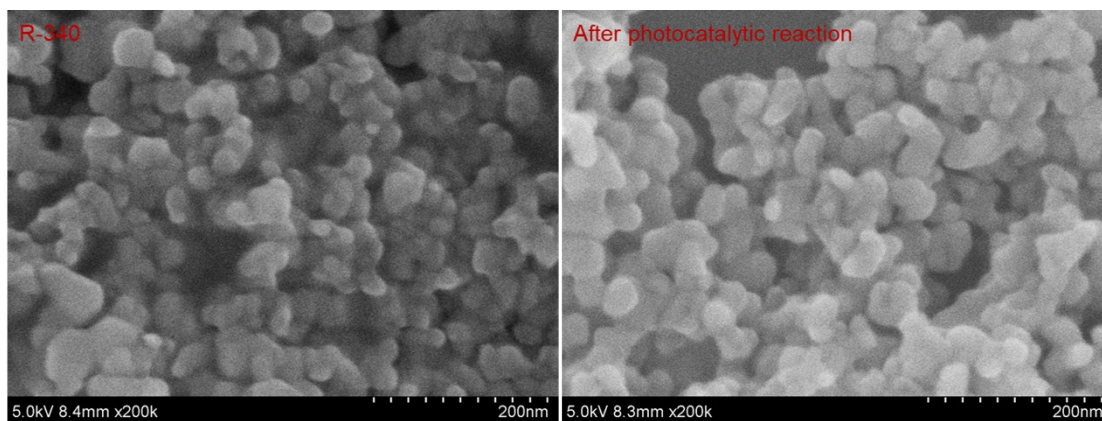

**Figure S9.** The SEM images of R-340 samples before and after photocatalytic reaction.

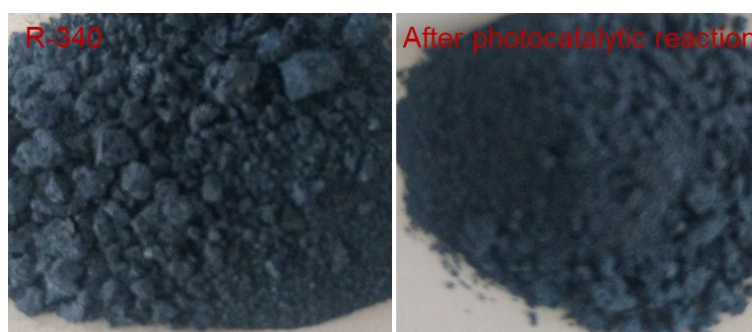

**Figure S10.** The optical images of R-340 samples before and after photocatalytic reaction.

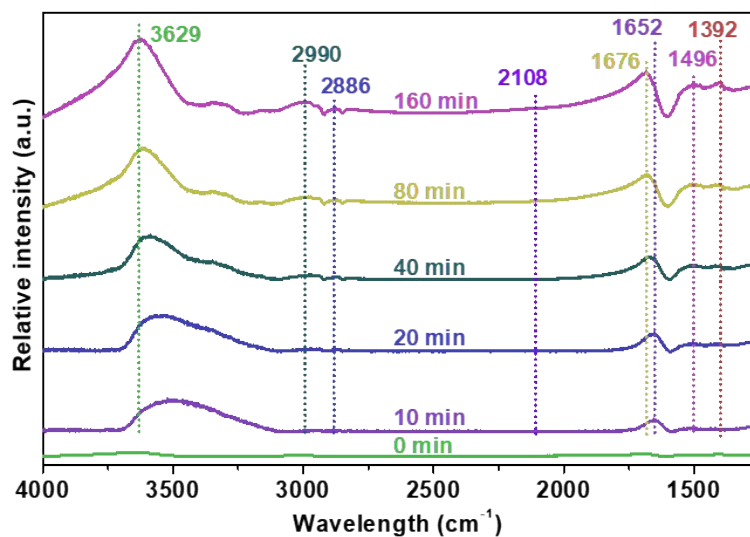

**Figure S11.** *In situ* DRIFTS detected as a function of time in the  $\text{N}_2$  fixation reaction, on the anatase  $\text{TiO}_2$ .

**Table S1.** Comparison of reduced TiO<sub>2</sub> with other reported photocatalysts towards N<sub>2</sub> fixation under full spectrum.

| catalyst                 | light source                   | conditions                        | NH <sub>3</sub>             | AQE                                 | Ref.      |
|--------------------------|--------------------------------|-----------------------------------|-----------------------------|-------------------------------------|-----------|
|                          |                                |                                   | production rate<br>μmol/h/g |                                     |           |
| TiO <sub>2</sub> -OV     | 300 W Hg lamp                  | water                             | 0.73                        | 0.7% at λ < 350 nm                  | 1         |
| CuCr                     | 300 W Xe lamp                  | water                             | 92.4                        | 0.44% at 380 nm                     | 2         |
| Diamond                  | 450 W high pressure Hg/Xe lamp | 35 mL water, 11.6 mg KI           | 7.43                        | 0.6% at 211.5 nm, 0.15% at 223.5 nm | 3         |
| BiOBr-OV                 | 300 W Xe lamp                  | water                             | 223.3                       | 1.3% at 380 nm                      | 4         |
| FeS-SnS chalcogel        | 150 W Xe lamp                  | 10 mL water, 150 mg wet chalcogel | 1.2                         | /                                   | 5         |
| Fe@3D graphene           | 500 W high pressure Hg lamp    | Gas reactor of 944 mL in capacity | 24                          | /                                   | 6         |
| C-WO <sub>3</sub>        | 500 mW/cm <sup>2</sup> Xe lamp | water                             | 205                         | /                                   | 7         |
| Sb/TiO <sub>2</sub>      | 300 W Xe lamp                  | Methanol (20 vol%) solution       | 32.2                        | /                                   | 8         |
| Ru-TiO <sub>2</sub>      | 300 W Xenon lamp               | Ethanol (20 vol%) solution        | 3.31                        | /                                   | 9         |
| Reduced TiO <sub>2</sub> | 300 W Xe lamp                  | Methanol (10 vol%) solution       | 324.9                       | 1.1% at 365 nm                      | This work |



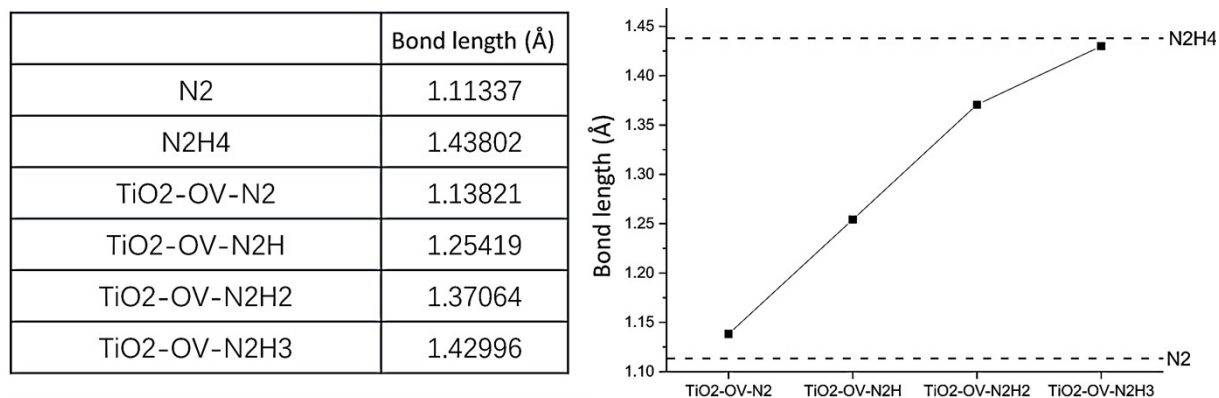

**Figure S12.** Theoretical calculation of each step of photocatalytic nitrogen fixation and the change of bond length of nitrogen molecule.

|                 | Energy/eV   | Adsorption energy eV |
|-----------------|-------------|----------------------|
| TiO2            | -986.443168 |                      |
| TiO2-OV         | -976.428616 |                      |
| N2              | -16.633372  |                      |
| NH3             | -19.093341  |                      |
| H               | -1.117086   |                      |
| N2H4            | -30.325537  |                      |
| TiO2-OV-N2      | -994.153488 | -1.0915              |
| TiO2-OV-N2H     | -1000.43333 | -5.16275             |
| TiO2-OV-N2H2    | -1005.09892 | -3.54851             |
| TiO2-OV-N2H3    | -1008.40921 | -2.19321             |
| TiO2-OV-N2H4    | -1014.66064 | -5.13434             |
| TiO2-OV-NH2+NH3 | -1018.66491 | -2.88719             |
| TiO2-OV-NH3     | -1021.21519 | -1.43319             |

**Figure S13.** Theoretical calculation of energy changes at each step in the photocatalytic nitrogen fixation process.

## Reference

1. H. Hirakawa, M. Hashimoto, Y. Shiraishi and T. Hirai, *J. Am. Chem. Soc.*, 2017, **139**, 10929-10936.
2. Y. Zhao, Y. Zhao, G. I. Waterhouse, L. Zheng, X. Cao, F. Teng, L. Z. Wu, C. H. Tung, D. O'Hare and T. Zhang, *Adv. Mater.*, 2017, **29**, 1703828.

3. D. Zhu, L. Zhang, R. E. Ruther and R. J. Hamers, *Nat. Mater.*, 2013, **12**, 836.
4. H. Li, J. Shang, Z. Ai and L. Zhang, *J. Am. Chem. Soc.*, 2015, **137**, 6393-6399.
5. J. Liu, M. S. Kelley, W. Wu, A. Banerjee, A. P. Douvalis, J. Wu, Y. Zhang, G. C. Schatz and M. G. Kanatzidis, *P. Natl. Acad. Sci.*, 2016, **113**, 5530-5535.
6. Y. Lu, Y. Yang, T. Zhang, Z. Ge, H. Chang, P. Xiao, Y. Xie, L. Hua, Q. Li and H. Li, *ACS Nano*, 2016, **10**, 10507-10515.
7. X. Li, W. Wang, D. Jiang, S. Sun, L. Zhang and X. Sun, *Chem. Eur. J.*, 2016, **22**, 13819-13822.
8. Z. Zhao, S. Hong, C. Yan, C. Choi, Y. Jung, Y. Liu, S. Liu, X. Li, J. Qiu and Z. Sun, *Chem. Commun.*, 2019.
9. S. Liu, Y. Wang, S. Wang, M. You, S. Hong, T.-S. Wu, Y.-L. Soo, Z. Zhao, G. Jiang and J. Qiu, *ACS Sustain. Chem. Eng.*, 2019, **7**, 6813-6820.
